# Supplementary figures and images for: Full-length direct RNA sequencing uncovers stress granule-dependent RNA decay upon cellular stress
Source: eLife journal article supplement (doi:10.7554/elife.96284), 2024-03-23

**Figure 3a**

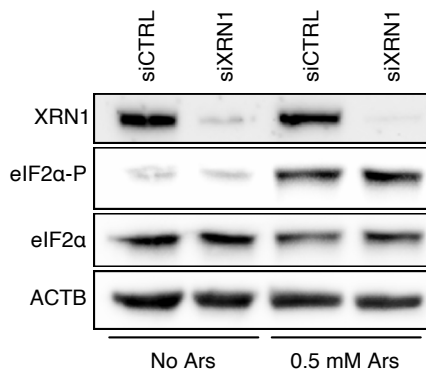

**Raw blots:**

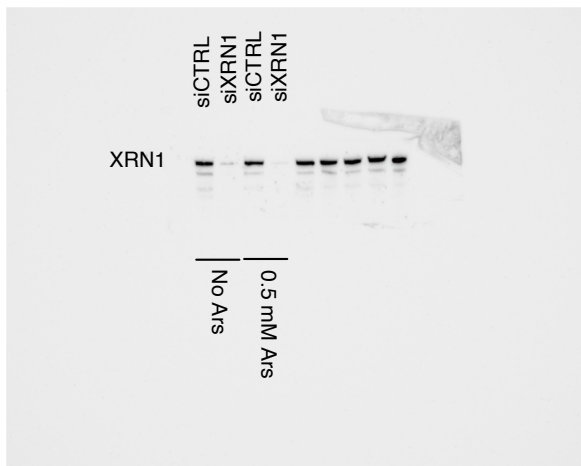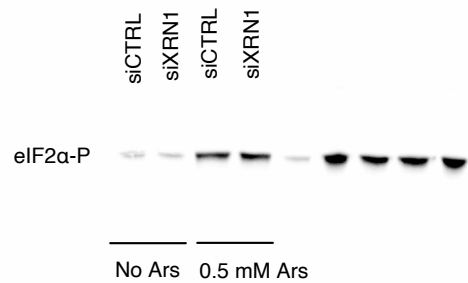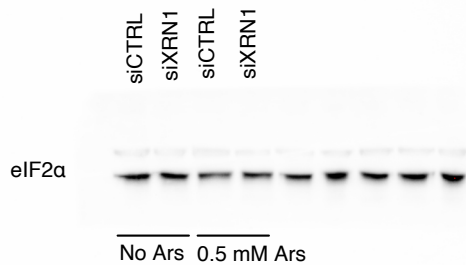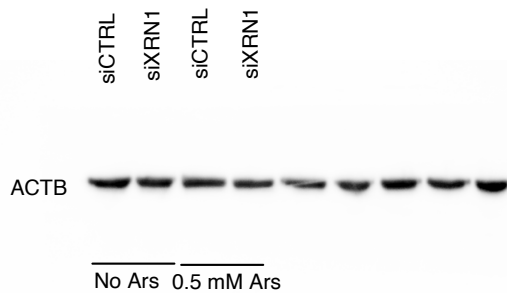

Supplement: fig3-data2 [file elife-96284-fig3-data2-v1.zip]

Supplementary Figure 3a

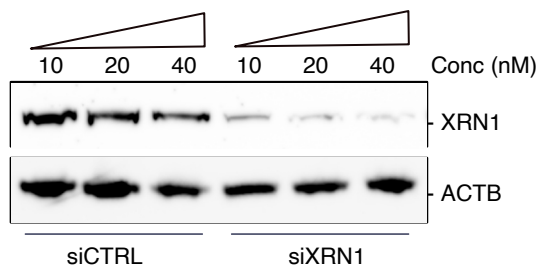

**Raw blots:**

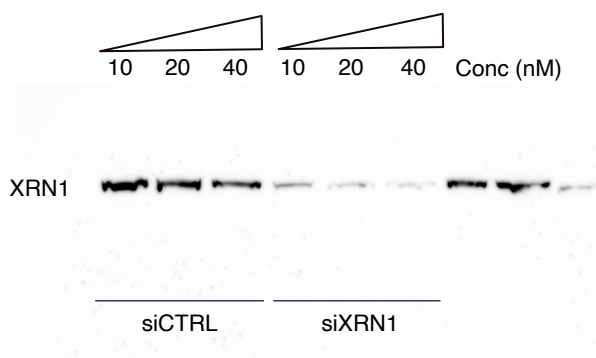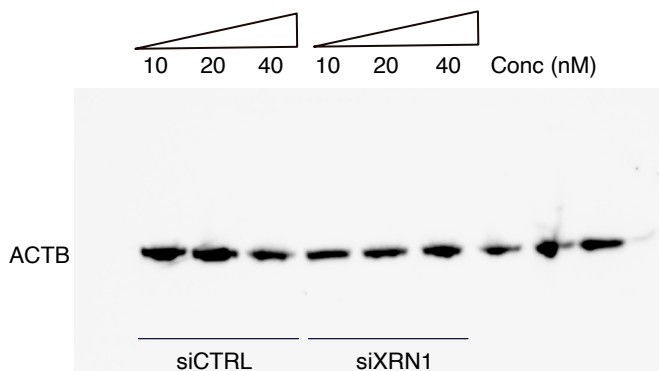

Supplement: fig3-figsupp1-data2 [file elife-96284-fig3-figsupp1-data2-v1.zip]

**Figure 5****a**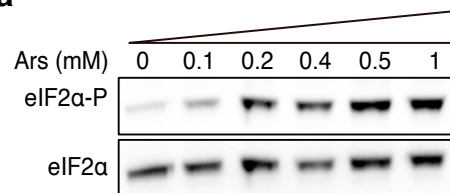**b**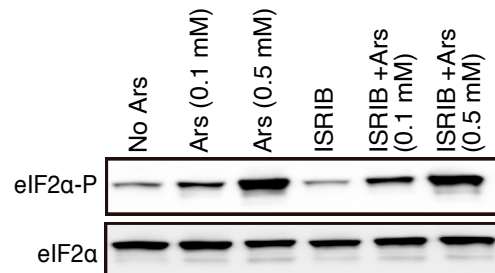**Raw blots:**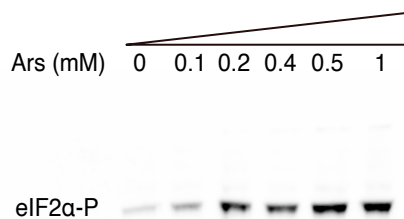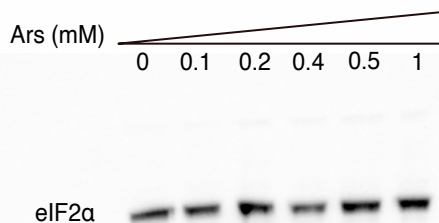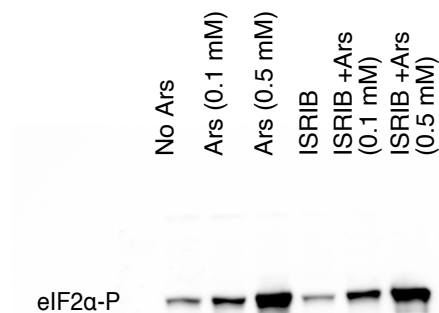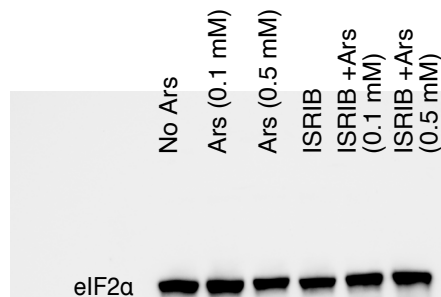

Supplement: fig5-data2 [file elife-96284-fig5-data2-v1.zip]
